# Supplementary material
Source: ML conference proceedings conference paper supplement (https://proceedings.mlr.press/v84/mokhtari18a.html)
Supplement: Supplementary file [file mokhtari18a-supp.pdf]

## 9 Supplementary Material

### 9.1 Proof of Lemma 1

Use the definition  $\mathbf{d}_t := (1 - \rho_t)\mathbf{d}_{t-1} + \rho_t\nabla\tilde{F}(\mathbf{x}_t, \mathbf{z}_t)$  to write  $\|\nabla F(\mathbf{x}_t) - \mathbf{d}_t\|^2$  as

$$\|\nabla F(\mathbf{x}_t) - \mathbf{d}_t\|^2 = \|\nabla F(\mathbf{x}_t) - (1 - \rho_t)\mathbf{d}_{t-1} - \rho_t\nabla\tilde{F}(\mathbf{x}_t, \mathbf{z}_t)\|^2. \quad (36)$$

Add and subtract the term  $(1 - \rho_t)\nabla F(\mathbf{x}_{t-1})$  to the right hand side of (36), regroup the terms to obtain

$$\|\nabla F(\mathbf{x}_t) - \mathbf{d}_t\|^2 = \|\rho_t(\nabla F(\mathbf{x}_t) - \nabla\tilde{F}(\mathbf{x}_t, \mathbf{z}_t)) + (1 - \rho_t)(\nabla F(\mathbf{x}_t) - \nabla F(\mathbf{x}_{t-1})) + (1 - \rho_t)(\nabla F(\mathbf{x}_{t-1}) - \mathbf{d}_{t-1})\|^2. \quad (37)$$

Define  $\mathcal{F}_t$  as a sigma algebra that measures the history of the system up until time  $t$ . Expanding the square and computing the conditional expectation  $\mathbb{E}[\cdot | \mathcal{F}_t]$  of the resulted expression yield

$$\begin{aligned} \mathbb{E}[\|\nabla F(\mathbf{x}_t) - \mathbf{d}_t\|^2 | \mathcal{F}_t] &= \rho_t^2 \mathbb{E}[\|\nabla F(\mathbf{x}_t) - \nabla\tilde{F}(\mathbf{x}_t, \mathbf{z}_t)\|^2 | \mathcal{F}_t] + (1 - \rho_t)^2 \|\nabla F(\mathbf{x}_{t-1}) - \mathbf{d}_{t-1}\|^2 \\ &\quad + (1 - \rho_t)^2 \|\nabla F(\mathbf{x}_t) - \nabla F(\mathbf{x}_{t-1})\|^2 + 2(1 - \rho_t)^2 \langle \nabla F(\mathbf{x}_t) - \nabla F(\mathbf{x}_{t-1}), \nabla F(\mathbf{x}_{t-1}) - \mathbf{d}_{t-1} \rangle. \end{aligned} \quad (38)$$

The term  $\mathbb{E}[\|\nabla F(\mathbf{x}_t) - \nabla\tilde{F}(\mathbf{x}_t, \mathbf{z}_t)\|^2 | \mathcal{F}_t]$  can be bounded above by  $\sigma^2$  according to Assumption 3. Based on Assumptions 1 and 2, we can also show that the squared norm  $\|\nabla F(\mathbf{x}_t) - \nabla F(\mathbf{x}_{t-1})\|^2$  is upper bounded by  $L^2D^2/T^2$ . Moreover, the inner product  $2\langle \nabla F(\mathbf{x}_t) - \nabla F(\mathbf{x}_{t-1}), \nabla F(\mathbf{x}_{t-1}) - \mathbf{d}_{t-1} \rangle$  can be upper bounded by  $\beta_t\|\nabla F(\mathbf{x}_{t-1}) - \mathbf{d}_{t-1}\|^2 + (1/\beta_t)L^2D^2/T^2$  using Young's inequality (i.e.,  $2\langle \mathbf{a}, \mathbf{b} \rangle \leq \beta\|\mathbf{a}\|^2 + \|\mathbf{b}\|^2/\beta$  for any  $\mathbf{a}, \mathbf{b} \in \mathbb{R}^n$  and  $\beta > 0$ ) and the conditions in Assumptions 1 and 2, where  $\beta_t > 0$  is a free scalar. Applying these substitutions into (38) leads to

$$\mathbb{E}[\|\nabla F(\mathbf{x}_t) - \mathbf{d}_t\|^2 | \mathcal{F}_t] \leq \rho_t^2\sigma^2 + (1 - \rho_t)^2\left(1 + \frac{1}{\beta_t}\right)\frac{L^2D^2}{T^2} + (1 - \rho_t)^2(1 + \beta_t)\|\nabla F(\mathbf{x}_{t-1}) - \mathbf{d}_{t-1}\|^2. \quad (39)$$

Replace  $(1 - \rho_t)^2$  by  $(1 - \rho_t)$ , set  $\beta := \rho_t/2$ , and compute the expectation with respect to  $\mathcal{F}_0$  to obtain

$$\mathbb{E}[\|\nabla F(\mathbf{x}_t) - \mathbf{d}_t\|^2] \leq \rho_t^2\sigma^2 + \frac{L^2D^2}{T^2} + \frac{2L^2D^2}{\rho_t T^2} + \left(1 - \frac{\rho_t}{2}\right)\mathbb{E}[\|\nabla F(\mathbf{x}_{t-1}) - \mathbf{d}_{t-1}\|^2], \quad (40)$$

and the claim in (14) follows.

### 9.2 Proof of Lemma 2

Define  $a_t := \mathbb{E}[\|\nabla F(\mathbf{x}_t) - \mathbf{d}_t\|^2]$ . Also, assume  $\rho_t = \frac{4}{(t+s)^{2/3}}$  where  $s$  is a fixed scalar and satisfies the condition  $8 \leq s \leq T$  (so the proof is slightly more general). Apply these substitutions into(14) to obtain

$$a_t \leq \left(1 - \frac{2}{(t+s)^{2/3}}\right)a_{t-1} + \frac{16\sigma^2}{(t+s)^{4/3}} + \frac{L^2D^2}{T^2} + \frac{L^2D^2(t+s)^{2/3}}{2T^2}. \quad (41)$$

Now use the conditions  $s \leq T$  and  $t \leq T$  to replace  $1/T$  in (41) by its upper bound  $2/(t+s)$ . Applying this substitution leads to

$$a_t \leq \left(1 - \frac{2}{(t+s)^{2/3}}\right)a_{t-1} + \frac{16\sigma^2}{(t+s)^{4/3}} + \frac{4L^2D^2}{(t+s)^2} + \frac{2L^2D^2}{(t+s)^{4/3}}. \quad (42)$$

Since  $t+s \geq 8$  we can write  $(t+s)^2 = (t+s)^{4/3}(t+s)^{2/3} \geq (t+s)^{4/3}8^{2/3} \geq 4(t+s)^{4/3}$ . Replacing the term  $(t+s)^2$  in (42) by  $4(t+s)^{4/3}$  and regrouping the terms lead to

$$a_t \leq \left(1 - \frac{2}{(t+s)^{2/3}}\right)a_{t-1} + \frac{16\sigma^2 + 3L^2D^2}{(t+s)^{4/3}} \quad (43)$$

Now we prove by induction that for  $t = 0, \dots, T$  we can write

$$a_t \leq \frac{Q}{(t+s+1)^{2/3}}, \quad (44)$$

where  $Q := \max\{a_0(s+1)^{2/3}, 16\sigma^2 + 3L^2D^2\}$ . First, note that  $Q \geq a_0(s+1)^{2/3}$  and therefore  $a_0 \leq Q/(s+1)^{2/3}$  and the base step of the induction holds true. Now assume that the condition in (44) holds for  $t = k - 1$ , i.e.,

$$a_{k-1} \leq \frac{Q}{(k+s)^{2/3}}. \quad (45)$$

The goal is to show that (44) also holds for  $t = k$ . To do so, first set  $t = k$  in the expression in (43) to obtain

$$a_k \leq \left(1 - \frac{2}{(k+s)^{2/3}}\right) a_{k-1} + \frac{16\sigma^2 + 3L^2D^2}{(k+s)^{4/3}}. \quad (46)$$

According to the definition of  $Q$ , we know that  $Q \geq 16\sigma^2 + 3L^2D^2$ . Moreover, based on the induction hypothesis it holds that  $a_{k-1} \leq \frac{Q}{(k+s)^{2/3}}$ . Using these inequalities and the expression in (46) we can write

$$a_k \leq \left(1 - \frac{2}{(k+s)^{2/3}}\right) \frac{Q}{(k+s)^{2/3}} + \frac{Q}{(k+s)^{4/3}}. \quad (47)$$

Pulling out  $\frac{Q}{(k+s)^{2/3}}$  as a common factor and simplifying and reordering terms it follows that (47) is equivalent to

$$a_k \leq Q \left( \frac{(k+s)^{2/3} - 1}{(k+s)^{4/3}} \right). \quad (48)$$

Based on the inequality

$$((k+s)^{2/3} - 1)((k+s)^{2/3} + 1) < (k+s)^{4/3}, \quad (49)$$

the result in (48) implies that

$$a_k \leq \left( \frac{Q}{(k+s)^{2/3} + 1} \right). \quad (50)$$

Since  $(k+s)^{2/3} + 1 \geq (k+s+1)^{2/3}$ , the result in (50) implies that

$$a_k \leq \left( \frac{Q}{(k+s+1)^{2/3}} \right), \quad (51)$$

and the induction step is complete. Therefore, the result in (44) holds for all  $t = 0, \dots, T$ . Indeed, by setting  $s = 8$ , the claim in (15) follows.

### 9.3 How to Construct an Unbiased Estimator of the Gradient in Multilinear Extensions

Recall that  $f(S) = \mathbb{E}_{\mathbf{z} \sim P}[\tilde{f}(S, \mathbf{z})]$ . In terms of the multilinear extensions, we obtain  $F(\mathbf{x}) = \mathbb{E}_{\mathbf{z} \sim P}[\tilde{F}(\mathbf{x}, \mathbf{z})]$ , where  $F$  and  $\tilde{F}$  denote the multilinear extension for  $f$  and  $\tilde{f}$ , respectively. So  $\nabla \tilde{F}(\mathbf{x}, \mathbf{z})$  is an unbiased estimator of  $\nabla F(\mathbf{x})$  when  $\mathbf{z} \sim P$ . Note that  $\tilde{F}(\mathbf{x}, \mathbf{z})$  is a multilinear extension.

It remains to provide an unbiased estimator for the gradient of a multilinear extension. We thus consider an arbitrary submodular set function  $g$  with multilinear  $G$ . Our goal is to provide an unbiased estimator for  $\nabla G(\mathbf{x})$ . We have  $G(\mathbf{x}) = \sum_{S \subseteq V} \prod_{i \in S} x_i \prod_{j \notin S} (1 - x_j) g(S)$ . Now, it can easily be shown that

$$\frac{\partial G}{\partial x_i} = G(\mathbf{x}; x_i \leftarrow 1) - G(\mathbf{x}; x_i \leftarrow 0). \quad (52)$$

where for example by  $(\mathbf{x}; x_i \leftarrow 1)$  we mean a vector which has value 1 on its  $i$ -th coordinate and is equal to  $\mathbf{x}$  elsewhere. To create an unbiased estimator for  $\frac{\partial G}{\partial x_i}$  at a point  $\mathbf{x}$  we can simply sample a set  $S$  by including each element in it independently with probability  $x_i$  and use  $g(S \cup \{i\}) - g(S \setminus \{i\})$  as an unbiased estimator for the  $i$ -th partial derivative. We can sample one single set  $S$  and use the above trick for all the coordinates. This involves  $n$  function computations for  $g$ . Having a mini-batch size  $B$  we can repeat this procedure  $B$  times and then average.

#### 9.4 Proof of Lemma 3

Based on the mean value theorem, we can write

$$\nabla F(\mathbf{x}_t + \frac{1}{T}\mathbf{v}_t) - \nabla F(\mathbf{x}_T) = \frac{1}{T}\mathbf{H}(\tilde{\mathbf{x}}_t)\mathbf{v}_t, \quad (53)$$

where  $\tilde{\mathbf{x}}_t$  is a convex combination of  $\mathbf{x}_t$  and  $\mathbf{x}_t + \frac{1}{T}\mathbf{v}_t$  and  $\mathbf{H}(\tilde{\mathbf{x}}_t) := \nabla^2 F(\tilde{\mathbf{x}}_t)$ . This expression shows that the difference between the coordinates of the vectors  $\nabla F(\mathbf{x}_t + \frac{1}{T}\mathbf{v}_t)$  and  $\nabla F(\mathbf{x}_t)$  can be written as

$$\nabla_j F(\mathbf{x}_t + \frac{1}{T}\mathbf{v}_t) - \nabla_j F(\mathbf{x}_t) = \frac{1}{T} \sum_{i=1}^n H_{j,i}(\tilde{\mathbf{x}}_t)v_{i,t}, \quad (54)$$

where  $v_{i,t}$  is the  $i$ -th element of the vector  $\mathbf{v}_t$  and  $H_{j,i}$  denotes the component in the  $j$ -th row and  $i$ -th column of the matrix  $\mathbf{H}$ . Hence, the norm of the difference  $|\nabla_j F(\mathbf{x}_t + \frac{1}{T}\mathbf{v}_t) - \nabla_j F(\mathbf{x}_t)|$  is bounded above by

$$|\nabla_j F(\mathbf{x}_t + \frac{1}{T}\mathbf{v}_t) - \nabla_j F(\mathbf{x}_t)| \leq \frac{1}{T} \left| \sum_{i=1}^n H_{j,i}(\tilde{\mathbf{x}}_t)v_{i,t} \right|. \quad (55)$$

Note here that the elements of the matrix  $\mathbf{H}(\tilde{\mathbf{x}}_t)$  are less than the maximum marginal value (i.e.  $\max_{i,j} |H_{i,j}(\tilde{\mathbf{x}}_t)| \leq \max_{i \in \{1, \dots, n\}} f(i) \triangleq m_f$ ). We thus get

$$|\nabla_j F(\mathbf{x}_t + \frac{1}{T}\mathbf{v}_t) - \nabla_j F(\mathbf{x}_t)| \leq \frac{m_f}{T} \sum_{i=1}^n |v_{i,t}|. \quad (56)$$

Note that at each round  $t$  of the algorithm, we have to pick a vector  $\mathbf{v}_t \in \mathcal{C}$  s.t. the inner product  $\langle \mathbf{v}_t, \mathbf{d}_t \rangle$  is maximized. Hence, without loss of generality we can assume that the vector  $\mathbf{v}_t$  is one of the extreme points of  $\mathcal{C}$ , i.e. it is of the form  $\mathbf{1}_I$  for some  $I \in \mathcal{I}$  (note that we can easily force integer vectors). Therefore by noticing that  $\mathbf{v}_t$  is an integer vector with at most  $r$  ones, we have

$$|\nabla_j F(\mathbf{x}_t + \frac{1}{T}\mathbf{v}_t) - \nabla_j F(\mathbf{x}_t)| \leq \frac{m_f \sqrt{r}}{T} \sqrt{\sum_{i=1}^n |v_{i,t}|^2}, \quad (57)$$

which yields the claim in (28).

#### 9.5 Proof of Theorem 2

According to the Taylor's expansion of the function  $F$  near the point  $\mathbf{x}_t$  we can write

$$\begin{aligned} F(\mathbf{x}_{t+1}) &= F(\mathbf{x}_t) + \langle \nabla F(\mathbf{x}_t), \mathbf{x}_{t+1} - \mathbf{x}_t \rangle + \frac{1}{2} \langle \mathbf{x}_{t+1} - \mathbf{x}_t, \mathbf{H}(\tilde{\mathbf{x}}_t)(\mathbf{x}_{t+1} - \mathbf{x}_t) \rangle \\ &= F(\mathbf{x}_t) + \frac{1}{T} \langle \nabla F(\mathbf{x}_t), \mathbf{v}_t \rangle + \frac{1}{2T^2} \langle \mathbf{v}_t, \mathbf{H}(\tilde{\mathbf{x}}_t)\mathbf{v}_t \rangle, \end{aligned} \quad (58)$$

where  $\tilde{\mathbf{x}}_t$  is a convex combination of  $\mathbf{x}_t$  and  $\mathbf{x}_t + \frac{1}{T}\mathbf{v}_t$  and  $\mathbf{H}(\tilde{\mathbf{x}}_t) := \nabla^2 F(\tilde{\mathbf{x}}_t)$ . Note that based on the inequality  $\max_{i,j} |H_{i,j}(\tilde{\mathbf{x}}_t)| \leq \max_{i \in \{1, \dots, n\}} f(i) \triangleq m_f$ , we can lower bound  $H_{ij}$  by  $-m_f$ . Therefore,

$$\langle \mathbf{v}_t, \mathbf{H}(\tilde{\mathbf{x}}_t)\mathbf{v}_t \rangle = \sum_{j=1}^n \sum_{i=1}^n v_{i,t}v_{j,t}H_{ij}(\tilde{\mathbf{x}}_t) \geq -m_f \sum_{j=1}^n \sum_{i=1}^n v_{i,t}v_{j,t} = -m_f \left( \sum_{i=1}^n v_{i,t} \right)^2 = -m_f r \|\mathbf{v}_t\|^2, \quad (59)$$

where the last inequality is because  $\mathbf{v}_t$  is a vector with  $r$  ones and  $n - r$  zeros (see the explanation in the proof of Lemma 3). Replace the expression  $\langle \mathbf{v}_t, \mathbf{H}(\tilde{\mathbf{x}}_t)\mathbf{v}_t \rangle$  in (58) by its lower bound in (59) to obtain

$$F(\mathbf{x}_{t+1}) \geq F(\mathbf{x}_t) + \frac{1}{T} \langle \nabla F(\mathbf{x}_t), \mathbf{v}_t \rangle - \frac{m_f r}{2T^2} \|\mathbf{v}_t\|^2. \quad (60)$$

In the following lemma we derive a variant of the result in Lemma 2 for the multilinear extension setting.

**Lemma 4.** *Consider Stochastic Continuous Greedy (SCG) outlined in Algorithm 1, and recall the definitions of the function  $F$  in (27), the rank  $r$ , and  $m_f \triangleq \max_{i \in \{1, \dots, n\}} f(i)$ . If we set  $\rho_t = \frac{4}{(t+8)^{2/3}}$ , then for  $t = 0, \dots, T$  and for  $j = 1, \dots, n$  it holds*

$$\mathbb{E} [\|\nabla F(\mathbf{x}_t) - \mathbf{d}_t\|^2] \leq \frac{Q}{(t+9)^{2/3}}, \quad (61)$$

where  $Q := \max\{9^{2/3}\|\nabla F(\mathbf{x}_0) - \mathbf{d}_0\|^2, 16\sigma^2 + 3m_f^2rD^2\}$ .

*Proof.* The proof is similar to the proof of Lemma 1. The main difference is to write the analysis for the  $j$ -th coordinate and replace  $L$  by  $m_f\sqrt{r}$  as shown in Lemma 3. Then using the proof techniques in Lemma 2 the claim in Lemma 4 follows. ■

The rest of the proof is identical to the proof of Theorem 1, by following the steps from (17) to (25) and considering the bound in (61) we obtain

$$\mathbb{E}[F(\mathbf{x}_T)] \geq (1 - 1/e)F(\mathbf{x}^*) - \frac{2DQ^{1/2}}{T^{1/3}} - \frac{m_frD^2}{2T}, \quad (62)$$

where  $Q := \max\{\|\nabla F(\mathbf{x}_0) - \mathbf{d}_0\|^2 9^{2/3}, 16\sigma^2 + 3rm_f^2D^2\}$ . Therefore, the claim in Theorem 2 follows.
